# Supplementary material
Source: Copernicus journal article supplement (doi:10.5194/ejm-38-197-2026)
Supplement: Supplementary file 1 [file ejm-38-197-2026-supplement.pdf]

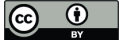

*Supplement of*

## **Selective uptake of rare earth elements and other cations in sector-zoned natural calcite as analogues for trivalent actinide behavior**

**Ferdinand Baumeister et al.**

*Correspondence to:* Ferdinand Baumeister ([kirchner@tu-berlin.de](mailto:kirchner@tu-berlin.de))

The copyright of individual parts of the supplement might differ from the article licence.

## Supplement – Data 1

n.a. – not available

b.d.l. – below limit of detection

### Concentration in µg/g

| Spot analysis # | 1       | 2       | 3       | 4       | 5       | 6       | 7       |
|-----------------|---------|---------|---------|---------|---------|---------|---------|
| Sector/Zone     | A       | A       | A       | A       | B       | B       | B       |
| <b>Li</b>       | 0.01    | n.a.    | 0.04    | 0.04    | 0.03    | 0.03    | 0.03    |
| 2SD Abs         | 0.01    | n.a.    | 0.01    | 0.01    | 0.01    | 0.01    | 0.01    |
| <b>Na</b>       | 154.57  | 38.06   | 1.44    | 51.48   | 1.05    | 1.37    | 19.10   |
| 2SD Abs         | 26.73   | 0.34    | 0.06    | 15.63   | 0.04    | 0.05    | 0.19    |
| <b>Mg</b>       | 66.97   | 70.91   | 65.33   | 64.26   | 43.97   | 45.32   | 43.23   |
| 2SD Abs         | 3.77    | 6.35    | 3.76    | 4.39    | 2.83    | 3.06    | 2.65    |
| <b>P</b>        | 2.22    | 1.84    | 1.07    | 0.21    | 1.18    | 2.44    | 4.28    |
| 2SD Abs         | 0.68    | 0.23    | 0.11    | 0.02    | 0.63    | 0.31    | 0.65    |
| <b>K</b>        | 3.05    | 2.04    | 0.20    | 1.90    | 0.49    | 0.13    | 0.53    |
| 2SD Abs         | 0.07    | 0.06    | 0.01    | 0.07    | 0.11    | 0.01    | 0.03    |
| <b>Ca</b>       | 404000  | 404000  | 404000  | 404000  | 404000  | 404000  | 404000  |
| 2SD Abs         | 0.004   | 0.004   | 0.004   | 0.004   | 0.004   | 0.004   | 0.004   |
| <b>Sc</b>       | 1.43    | 1.20    | 1.35    | 1.20    | 22.18   | 22.61   | 22.59   |
| 2SD Abs         | 0.08    | 0.06    | 0.07    | 0.07    | 0.76    | 0.69    | 0.82    |
| <b>V</b>        | 0.04    | b.d.l.  | 0.01    | 0.01    | 0.08    | 0.16    | b.d.l.  |
| 2SD Abs         | 0.00    | -       | 0.00    | 0.00    | 0.01    | 0.01    | -       |
| <b>Cr</b>       | 0.83    | 0.86    | 0.90    | 0.83    | 1.00    | 0.82    | 0.87    |
| 2SD Abs         | 0.07    | 0.08    | 0.07    | 0.06    | 0.33    | 0.07    | 0.06    |
| <b>Mn</b>       | 5428.78 | 5352.43 | 5575.09 | 5808.95 | 4178.55 | 3809.35 | 4279.35 |
| 2SD Abs         | 350.18  | 366.80  | 333.06  | 508.77  | 271.86  | 243.80  | 294.24  |
| <b>Fe</b>       | 172.35  | 181.26  | 177.63  | 174.27  | 142.69  | 118.54  | 131.59  |
| 2SD Abs         | 0.06    | 0.09    | 0.07    | 0.07    | 0.08    | 0.07    | 0.06    |
| <b>Co</b>       | 0.01    | 0.01    | 0.01    | 0.01    | 0.01    | 0.01    | 0.01    |
| 2SD Abs         | 0.00    | 0.00    | 0.00    | 0.00    | 0.00    | 0.01    | 0.00    |
| <b>Ni</b>       | 0.03    | 0.10    | 0.05    | 0.09    | 0.35    | 0.05    | 0.10    |
| 2SD Abs         | 0.01    | 0.01    | 0.02    | 0.05    | 0.03    | 0.04    | 0.03    |
| <b>Cu</b>       | 2.29    | 0.42    | 0.99    | 1.50    | 0.55    | 0.38    | 1.73    |
| 2SD Abs         | 0.13    | 0.05    | 0.11    | 0.13    | 0.05    | 0.05    | 0.21    |
| <b>Zn</b>       | 14.70   | 3.24    | 9.03    | 13.98   | 3.14    | 3.03    | 16.17   |
| 2SD Abs         | 0.74    | 0.20    | 0.62    | 0.75    | 0.10    | 0.23    | 1.05    |
| <b>As</b>       | 0.02    | 0.07    | 0.05    | 0.05    | 0.10    | 0.10    | 0.15    |
| 2SD Abs         | 0.01    | 0.02    | 0.03    | 0.01    | 0.01    | 0.01    | 0.02    |
| <b>Se</b>       | 3.72    | 6.10    | 3.72    | 2.45    | 4.31    | 6.51    | 4.14    |
| 2SD Abs         | 0.23    | 0.26    | 0.67    | 0.14    | 0.29    | 0.46    | 0.20    |
| <b>Rb</b>       | 0.02    | 0.02    | 0.01    | 0.02    | 0.02    | 0.03    | 0.03    |
| 2SD Abs         | 0.01    | 0.00    | 0.00    | 0.00    | 0.00    | 0.00    | 0.00    |
| <b>Sr</b>       | 62.64   | 60.76   | 60.65   | 62.20   | 75.50   | 68.34   | 77.15   |
| 2SD Abs         | 4.54    | 4.03    | 3.58    | 5.19    | 4.78    | 4.39    | 5.81    |
| <b>Y</b>        | 1.99    | 1.15    | 1.49    | 1.21    | 143.64  | 129.04  | 140.75  |
| 2SD Abs         | 0.23    | 0.10    | 0.13    | 0.10    | 9.73    | 8.43    | 8.57    |

|           |        |        |        |        |        |        |        |
|-----------|--------|--------|--------|--------|--------|--------|--------|
| <b>Zr</b> | 0.02   | 0.03   | b.d.l. | 0.01   | b.d.l. | b.d.l. | 0.01   |
| 2SD Abs   | 0.00   | 0.00   | -      | 0.00   |        |        | 0.00   |
| <b>Nb</b> | b.d.l. |
| 2SD Abs   | -      | -      | -      | -      | -      | -      | -      |
| <b>Mo</b> | 0.07   | 0.06   | 0.07   | 0.07   | 0.06   | 0.06   | 0.06   |
| 2SD Abs   | 0.01   | 0.01   | 0.01   | 0.01   | 0.01   | 0.01   | 0.01   |
| <b>Cd</b> | 0.04   | 0.07   | 0.06   | 0.07   | 0.05   | 0.05   | 0.07   |
| 2SD Abs   | 0.03   | 0.03   | 0.03   | 0.03   | 0.03   | 0.02   | 0.02   |
| <b>Sb</b> | 0.02   | 0.01   | n.a.   | b.d.l. | 0.02   | 0.02   | n.a.   |
| 2SD Abs   | 0.01   | 0.01   | -      | -      | 0.01   | 0.01   |        |
| <b>Ba</b> | 2.64   | 0.05   | 0.06   | 0.70   | 0.03   | 0.03   | 0.11   |
| 2SD Abs   | 0.74   | 0.01   | 0.04   | 0.04   | 0.01   | 0.02   | 0.04   |
| <b>La</b> | 0.09   | 0.02   | 0.03   | 0.01   | 8.36   | 7.82   | 8.85   |
| 2SD Abs   | 0.01   | 0.00   | 0.00   | 0.00   | 0.43   | 0.44   | 0.60   |
| <b>Ce</b> | 0.26   | 0.07   | 0.11   | 0.06   | 28.81  | 26.21  | 29.36  |
| 2SD Abs   | 0.05   | 0.01   | 0.01   | 0.01   | 1.80   | 1.57   | 2.02   |
| <b>Pr</b> | 0.05   | 0.01   | 0.02   | 0.01   | 4.27   | 3.72   | 4.06   |
| 2SD Abs   | 0.00   | 0.00   | 0.00   | 0.00   | 0.28   | 0.24   | 0.24   |
| <b>Nd</b> | 0.19   | 0.07   | 0.12   | 0.07   | 18.01  | 16.51  | 17.70  |
| 2SD Abs   | 0.02   | 0.01   | 0.01   | 0.01   | 0.98   | 1.01   | 0.96   |
| <b>Sm</b> | 0.08   | 0.04   | 0.05   | 0.03   | 5.40   | 5.03   | 5.50   |
| 2SD Abs   | 0.01   | 0.01   | 0.01   | 0.01   | 0.25   | 0.29   | 0.29   |
| <b>Eu</b> | 0.02   | 0.01   | 0.01   | 0.01   | 0.99   | 0.95   | 1.03   |
| 2SD Abs   | 0.00   | 0.00   | 0.00   | 0.00   | 0.04   | 0.05   | 0.05   |
| <b>Gd</b> | 0.12   | 0.08   | 0.08   | 0.08   | 6.70   | 6.75   | 6.72   |
| 2SD Abs   | 0.01   | 0.01   | 0.01   | 0.01   | 0.17   | 0.19   | 0.23   |
| <b>Tb</b> | 0.02   | 0.02   | 0.02   | 0.01   | 1.59   | 1.63   | 1.59   |
| 2SD Abs   | 0.00   | 0.00   | 0.00   | 0.00   | 0.05   | 0.05   | 0.04   |
| <b>Dy</b> | 0.21   | 0.11   | 0.18   | 0.12   | 13.54  | 13.18  | 13.63  |
| 2SD Abs   | 0.02   | 0.01   | 0.01   | 0.01   | 0.60   | 0.59   | 0.54   |
| <b>Ho</b> | 0.06   | 0.04   | 0.05   | 0.04   | 4.00   | 3.78   | 4.18   |
| 2SD Abs   | 0.01   | 0.00   | 0.00   | 0.00   | 0.22   | 0.21   | 0.27   |
| <b>Er</b> | 0.26   | 0.15   | 0.20   | 0.15   | 16.27  | 15.33  | 17.59  |
| 2SD Abs   | 0.03   | 0.01   | 0.02   | 0.01   | 1.02   | 0.94   | 1.39   |
| <b>Tm</b> | 0.05   | 0.03   | 0.04   | 0.03   | 3.48   | 3.14   | 3.45   |
| 2SD Abs   | 0.00   | 0.00   | 0.00   | 0.00   | 0.23   | 0.20   | 0.21   |
| <b>Yb</b> | 0.53   | 0.27   | 0.38   | 0.28   | 32.99  | 30.31  | 32.70  |
| 2SD Abs   | 0.07   | 0.03   | 0.04   | 0.03   | 1.91   | 1.86   | 1.86   |
| <b>Lu</b> | 0.13   | 0.05   | 0.07   | 0.05   | 5.81   | 5.44   | 5.95   |
| 2SD Abs   | 0.02   | 0.00   | 0.01   | 0.01   | 0.26   | 0.33   | 0.28   |
| <b>W</b>  | 0.01   | b.d.l. | b.d.l. | b.d.l. | b.d.l. | b.d.l. | b.d.l. |
| 2SD Abs   | 0.00   | -      | -      | -      | -      | -      | -      |
| <b>Pb</b> | 0.15   | 0.04   | 0.07   | 0.12   | 0.14   | 0.03   | 0.08   |
| 2SD Abs   | 0.02   | 0.01   | 0.02   | 0.02   | 0.01   | 0.02   | 0.03   |



|           |          |          |          |          |          |          |          |
|-----------|----------|----------|----------|----------|----------|----------|----------|
| 2SD Abs   |          |          |          |          |          |          |          |
| <b>Mo</b> | 7.15E-10 | 6.22E-10 | 7.26E-10 | 7.48E-10 | 6.39E-10 | 6.63E-10 | 6.37E-10 |
| 2SD Abs   | 1.19E-10 | 1.06E-10 | 1.20E-10 | 1.22E-10 | 1.13E-10 | 1.12E-10 | 1.18E-10 |
| <b>Cd</b> | 3.49E-10 | 6.20E-10 | 5.31E-10 | 6.38E-10 | 4.54E-10 | 4.04E-10 | 6.34E-10 |
| 2SD Abs   | 2.43E-10 | 3.00E-10 | 2.83E-10 | 2.53E-10 | 2.50E-10 | 2.07E-10 | 1.88E-10 |
| <b>Sb</b> | 1.64E-10 | 8.21E-11 | n.a.     | n.a.     | 1.64E-10 | 1.64E-10 | n.a.     |
| 2SD Abs   | 8.7E-11  | 4.85E-11 | -        | -        | 8.8E-11  | 6.5E-11  | -        |
| <b>Ba</b> | 1.92E-08 | 3.62E-10 | 4.35E-10 | 5.08E-09 | 2.23E-10 | 1.99E-10 | 8.16E-10 |
| 2SD Abs   | 5.4E-09  | 8.9E-11  | 3.04E-10 | 3.2E-10  | 6.7E-11  | 1.20E-10 | 3.25E-10 |
| <b>La</b> | 6.35E-10 | 1.43E-10 | 2.15E-10 | 7.38E-11 | 6.02E-08 | 5.63E-08 | 6.37E-08 |
| 2SD Abs   | 4.6E-11  | 2.0E-11  | 2.3E-11  | 1.10E-11 | 3.1E-09  | 3.2E-09  | 4.4E-09  |
| <b>Ce</b> | 1.89E-09 | 4.97E-10 | 7.81E-10 | 4.39E-10 | 2.06E-07 | 1.87E-07 | 2.10E-07 |
| 2SD Abs   | 3.6E-10  | 7.8E-11  | 4.3E-11  | 5.3E-11  | 1.3E-08  | 1.1E-08  | 1.4E-08  |
| <b>Pr</b> | 3.48E-10 | 7.06E-11 | 1.41E-10 | 7.27E-11 | 3.03E-08 | 2.64E-08 | 2.88E-08 |
| 2SD Abs   | 3.3E-11  | 9.6E-12  | 1.7E-11  | 1.05E-11 | 2.0E-09  | 1.7E-09  | 1.7E-09  |
| <b>Nd</b> | 1.29E-09 | 4.83E-10 | 8.28E-10 | 4.97E-10 | 1.25E-07 | 1.14E-07 | 1.23E-07 |
| 2SD Abs   | 1.4E-10  | 6.9E-11  | 9.8E-11  | 7.0E-11  | 7E-09    | 7E-09    | 7E-09    |
| <b>Sm</b> | 5.22E-10 | 2.65E-10 | 3.31E-10 | 2.05E-10 | 3.59E-08 | 3.34E-08 | 3.66E-08 |
| 2SD Abs   | 9.3E-11  | 5.7E-11  | 7.0E-11  | 4.7E-11  | 1.6E-09  | 2.0E-09  | 1.9E-09  |
| <b>Eu</b> | 1.29E-10 | 6.55E-11 | 6.55E-11 | 6.75E-11 | 6.52E-09 | 6.28E-09 | 6.77E-09 |
| 2SD Abs   | 2.7E-11  | 1.80E-11 | 1.46E-11 | 1.44E-11 | 2.5E-10  | 3.3E-10  | 3.5E-10  |
| <b>Gd</b> | 7.48E-10 | 5.06E-10 | 5.06E-10 | 5.21E-10 | 4.26E-08 | 4.29E-08 | 4.28E-08 |
| 2SD Abs   | 9E-13    | 4E-13    | 4E-13    | 4E-13    | 2.8E-09  | 3.2E-09  | 2.8E-09  |
| <b>Tb</b> | 1.23E-10 | 1.25E-10 | 1.25E-10 | 6.45E-11 | 1.00E-08 | 1.02E-08 | 1.00E-08 |
| 2SD Abs   | 1.4E-11  | 1.6E-11  | 1.6E-11  | 8.4E-12  | 2.9E-10  | 3E-10    | 2.8E-10  |
| <b>Dy</b> | 1.27E-09 | 6.74E-10 | 1.10E-09 | 7.57E-10 | 8.33E-08 | 8.11E-08 | 8.39E-08 |
| 2SD Abs   | 1.0E-10  | 6.5E-11  | 8.8E-11  | 7.1E-11  | 3.7E-09  | 3.6E-09  | 3.3E-09  |
| <b>Ho</b> | 3.57E-10 | 2.41E-10 | 3.02E-10 | 2.49E-10 | 2.43E-08 | 2.29E-08 | 2.53E-08 |
| 2SD Abs   | 4.5E-11  | 2.4E-11  | 2.2E-11  | 2.1E-11  | 1.3E-09  | 1.2E-09  | 1.6E-09  |
| <b>Er</b> | 1.58E-09 | 8.92E-10 | 1.19E-09 | 9.19E-10 | 9.73E-08 | 9.17E-08 | 1.05E-07 |
| 2SD Abs   | 2.0E-10  | 8.6E-11  | 1.4E-10  | 6.7E-11  | 6.1E-09  | 6E-09    | 8E-09    |
| <b>Tm</b> | 2.90E-10 | 1.77E-10 | 2.36E-10 | 1.82E-10 | 2.06E-08 | 1.86E-08 | 2.04E-08 |
| 2SD Abs   | 2.4E-11  | 1.7E-11  | 2.1E-11  | 1.6E-11  | 1.4E-09  | 1.2E-09  | 1.2E-09  |
| <b>Yb</b> | 3.06E-09 | 1.55E-09 | 2.18E-09 | 1.60E-09 | 1.91E-07 | 1.75E-07 | 1.89E-07 |
| 2SD Abs   | 4.2E-10  | 1.7E-10  | 2.1E-10  | 1.6E-10  | 1.1E-08  | 1.1E-08  | 1.1E-08  |
| <b>Lu</b> | 7.28E-10 | 2.84E-10 | 3.98E-10 | 2.93E-10 | 3.32E-08 | 3.11E-08 | 3.40E-08 |
| 2SD Abs   | 1.14E-10 | 2.1E-11  | 4.2E-11  | 3.0E-11  | 1.5E-09  | 1.9E-09  | 1.6E-09  |
| <b>W</b>  | 5.16E-11 | b.d.l.   | b.d.l.   | b.d.l.   | b.d.l.   | b.d.l.   | b.d.l.   |
| 2SD Abs   | 1.98E-11 | -        | -        | -        | -        | -        | -        |
| <b>Pb</b> | 7.10E-10 | 1.92E-10 | 3.36E-10 | 5.94E-10 | 6.90E-10 | 1.32E-10 | 3.93E-10 |
| 2SD Abs   | 7.6E-11  | 4.9E-11  | 9.8E-11  | 7.7E-11  | 4.9E-11  | 8.4E-11  | 1.31E-10 |

**Supplement - Data 2 – ECRM 752-2-NP calcite powder standard**

| Element | Measured | ±2SD  | Measured_Low | Measured_High | Expected | ±95%CI | Expected_Low | Expected_High | Overlap (Y/N) | Abs_Deviation | Percent_Deviation |
|---------|----------|-------|--------------|---------------|----------|--------|--------------|---------------|---------------|---------------|-------------------|
| Li      | 1.333    | 0.159 | 1.174        | 1.492         | 1.210    | 0.091  | 1.119        | 1.301         | Y             |               |                   |
| Na      | 55.01    | 5.75  | 49.26        | 60.76         | 49.70    | 7.40   | 42.30        | 57.10         | Y             |               |                   |
| Mg      | 947.7    | 66.9  | 880.8        | 1014.6        | 1030.0   | 34.1   | 995.9        | 1064.1        | Y             |               |                   |
| P       | 26.06    | 2.64  | 23.41        | 28.70         |          |        |              |               |               |               |                   |
| K       | 182.3    | 17.4  | 164.9        | 199.7         |          |        |              |               |               |               |                   |
| Ca      | 404000   | 0     | 404000       | 404000        |          |        |              |               |               |               |                   |
| Sc      | 0.325    | 0.077 | 0.248        | 0.403         |          |        |              |               |               |               |                   |
| V       | 3.211    | 0.190 | 3.021        | 3.401         | 2.760    | 0.315  | 2.445        | 3.075         | Y             |               |                   |
| Cr      | 5.117    | 1.622 | 3.495        | 6.738         | 6.800    | 0.704  | 6.096        | 7.504         | Y             |               |                   |
| Mn      | 83.26    | 4.53  | 78.73        | 87.79         | 80.40    | 2.20   | 78.20        | 82.60         | Y             |               |                   |
| Fe      | 308.7    | 34.0  | 274.7        | 342.7         | 289.0    | 8.2    | 280.8        | 297.2         | Y             |               |                   |
| Co      | 0.306    | 0.160 | 0.146        | 0.466         |          |        |              |               |               |               |                   |
| Ni      | 2.456    | 0.261 | 2.196        | 2.717         |          |        |              |               |               |               |                   |
| Cu      | 1.448    | 0.133 | 1.315        | 1.581         | 1.320    | 0.246  | 1.074        | 1.566         | Y             |               |                   |
| Zn      | 5.029    | 0.291 | 4.738        | 5.319         | 5.180    | 0.647  | 4.533        | 5.827         | Y             |               |                   |
| As      | 0.209    | 0.061 | 0.148        | 0.270         |          |        |              |               |               |               |                   |
| Se      | 12.92    | 15.70 | -2.79        | 28.62         |          |        |              |               |               |               |                   |
| Rb      | 0.987    | 0.101 | 0.886        | 1.088         | 0.916    | 0.030  | 0.886        | 0.946         | Y             |               |                   |
| Sr      | 166.5    | 13.5  | 153.0        | 179.9         | 157.0    | 2.9    | 154.1        | 159.9         | Y             |               |                   |
| Y       | 3.463    | 0.383 | 3.080        | 3.847         | 1.970    | 0.106  | 1.864        | 2.076         | N             | 1.004         | 51.0              |
| Zr      | 2.121    | 1.083 | 1.038        | 3.204         |          |        |              |               |               |               |                   |
| Nb      | 0.152    | 0.081 | 0.071        | 0.232         |          |        |              |               |               |               |                   |
| Mo      | 0.065    | 0.019 | 0.047        | 0.084         | 0.080    | 0.003  | 0.077        | 0.083         | Y             |               |                   |
| Cd      | 0.602    | 0.089 | 0.513        | 0.692         | 0.647    | 0.028  | 0.619        | 0.675         | Y             |               |                   |
| Sb      | 0.024    | 0.012 | 0.012        | 0.035         |          |        |              |               |               |               |                   |
| Ba      | 61.99    | 2.29  | 59.70        | 64.28         | 59.60    | 16.00  | 43.60        | 75.60         | Y             |               |                   |
| La      | 1.666    | 0.718 | 0.949        | 2.384         | 1.380    | 0.009  | 1.371        | 1.389         | Y             |               |                   |
| Ce      | 1.876    | 1.927 | -0.051       | 3.802         | 1.320    | 0.014  | 1.306        | 1.334         | Y             |               |                   |
| Pr      | 0.331    | 0.131 | 0.200        | 0.462         | 0.286    | 0.003  | 0.283        | 0.289         | Y             |               |                   |
| Nd      | 1.428    | 0.339 | 1.089        | 1.767         | 1.210    | 0.018  | 1.192        | 1.228         | Y             |               |                   |

|    |       |       |        |       |       |       |       |       |   |       |      |
|----|-------|-------|--------|-------|-------|-------|-------|-------|---|-------|------|
| Sm | 0.292 | 0.041 | 0.251  | 0.333 | 0.251 | 0.001 | 0.250 | 0.252 | Y |       |      |
| Eu | 0.072 | 0.009 | 0.063  | 0.080 | 1.141 | 0.005 | 1.136 | 1.146 | N | 1.056 | 92.5 |
| Gd | 0.355 | 0.046 | 0.309  | 0.401 | 0.298 | 0.001 | 0.297 | 0.299 | N | 0.010 | 3.4  |
| Tb | 0.059 | 0.008 | 0.050  | 0.067 | 0.043 | 0.001 | 0.042 | 0.044 | N | 0.006 | 15.1 |
| Dy | 0.343 | 0.027 | 0.316  | 0.370 | 0.267 | 0.004 | 0.263 | 0.271 | N | 0.045 | 16.8 |
| Ho | 0.072 | 0.007 | 0.065  | 0.080 | 0.059 | 0.001 | 0.058 | 0.060 | N | 0.005 | 8.2  |
| Er | 0.217 | 0.029 | 0.188  | 0.246 | 0.165 | 0.012 | 0.153 | 0.177 | N | 0.011 | 6.9  |
| Tm | 0.027 | 0.005 | 0.022  | 0.032 | 0.021 | 0.001 | 0.020 | 0.022 | N | 0.000 | 2.1  |
| Yb | 0.178 | 0.029 | 0.149  | 0.207 | 0.122 | 0.001 | 0.121 | 0.123 | N | 0.026 | 21.2 |
| Lu | 0.027 | 0.005 | 0.022  | 0.031 | 0.019 | 0.001 | 0.018 | 0.020 | N | 0.002 | 11.8 |
| W  | 0.025 | 0.031 | -0.005 | 0.056 |       |       |       |       |   |       |      |
| Pb | 1.978 | 0.260 | 1.718  | 2.238 | 1.980 | 0.394 | 1.586 | 2.374 | Y |       |      |
| Th | 0.117 | 0.082 | 0.036  | 0.199 | 0.036 | 0.001 | 0.035 | 0.037 | Y |       |      |
| U  | 0.494 | 0.032 | 0.461  | 0.526 | 0.461 | 0.011 | 0.450 | 0.472 | Y |       |      |
